# Supplementary material for: Flavor and Texture Characteristics of ‘Fuji’ and Related Apple (Malus domestica L.) Cultivars, Focusing on the Rich Watercore
Source: MDPI journal article supplement (doi:10.3390/molecules25051114), 2020-03-02
Supplement: s1 [file s1]

Intensity of water-soluble compounds in watercored and nonwatercored 'Fuji' and 'Koutoku' apples

| water-soluble<br>compounds    | 'Fuji' |       | 'Koutoku' |       | Significance |     |             |
|-------------------------------|--------|-------|-----------|-------|--------------|-----|-------------|
|                               | WC     | nonWC | WC        | nonWC | cultivar     | WC  | interaction |
| <b>Amino acids, polyamine</b> |        |       |           |       |              |     |             |
| L-Alanine                     | 1      | 1.39  | 0.68      | 3.16  | **           | *** | **          |
| L-Valine                      | 1      | 0.73  | 0.85      | 1.42  | ns           | ns  | *           |
| L-Serine                      | 1      | 0.23  | 1.27      | 1.53  | *            | ns  | ns          |
| b-Alanine                     | 1      | 0.92  | 1.97      | 4.35  | *            | ns  | ns          |
| L-Aspartic                    | 1      | 0.02  | 1.78      | 1.12  | ns           | ns  | ns          |
| 4-Aminobutyric                | 1      | 0.83  | 0.37      | 0.52  | ns           | ns  | ns          |
| L-Glutamic                    | 1      | 0.61  | 1.91      | 3.52  | ***          | ns  | *           |
| L-Asparagine                  | 1      | 0.09  | 2.14      | 1.34  | ns           | ns  | ns          |
| Pyroglutamic                  | 1      | 0.97  | 1.72      | 3.14  | **           | *   | *           |
| Putrescine                    | 1      | 1.69  | 1.68      | 3.10  | *            | *   | ns          |
| <b>Acids</b>                  |        |       |           |       |              |     |             |
| Malic acid                    | 1      | 1.05  | 0.58      | 0.70  | ***          | ns  | ns          |
| Erythronic acid               | 1      | 1.81  | 0.72      | 1.12  | **           | **  | ns          |
| Threonic acid                 | 1      | 1.33  | 0.75      | 0.92  | ns           | ns  | ns          |
| Ribonic acid                  | 1      | 3.86  | 0.77      | 1.21  | ns           | ns  | ns          |
| Shikimic acid                 | 1      | 0.76  | 1.44      | 1.60  | ns           | ns  | ns          |
| Citric acid                   | 1      | 0.73  | 1.12      | 1.14  | ns           | ns  | ns          |
| Dehydroascorbic acid          | 1      | 1.87  | 1.02      | 1.93  | ns           | **  | ns          |
| D(-)-Quinic acid              | 1      | 0.72  | 0.90      | 1.28  | ns           | ns  | ns          |
| Phosphoric acid               | 1      | 0.76  | 0.65      | 0.59  | ns           | ns  | ns          |
| Galactaric acid               | 1      | 2.14  | 0.99      | 1.75  | ns           | **  | ns          |
| <b>Sugars</b>                 |        |       |           |       |              |     |             |
| Fructose                      | 1      | 1.02  | 0.78      | 0.83  | ***          | ns  | ns          |
| Glucose                       | 1      | 0.81  | 0.68      | 0.64  | **           | *   | ns          |
| Sucrose                       | 1      | 1.13  | 0.87      | 1.01  | *            | *   | ns          |
| Xylose                        | 1      | 0.59  | 1.23      | 1.11  | *            | ns  | ns          |
| Arabinose                     | 1      | 0.92  | 0.95      | 1.09  | ns           | ns  | ns          |
| Ribose                        | 1      | 0.90  | 1.68      | 1.40  | ***          | *   | ns          |
| Rhamnose                      | 1      | 0.88  | 0.93      | 0.96  | ns           | ns  | ns          |
| Raffinose                     | 1      | 1.07  | 1.44      | 1.21  | **           | ns  | ns          |
| <b>Sugar alcohols</b>         |        |       |           |       |              |     |             |
| Erythritol                    | 1      | 1.12  | 1.90      | 1.73  | **           | ns  | ns          |
| Xylitol                       | 1      | 1.21  | 1.00      | 1.07  | ns           | ns  | ns          |
| Sorbitol                      | 1      | 2.16  | 0.98      | 1.77  | ns           | **  | ns          |
| Threitol                      | 1      | 0.86  | 1.09      | 1.15  | ns           | ns  | ns          |
| myo-Inositol                  | 1      | 1.03  | 1.68      | 1.90  | **           | ns  | ns          |

Intensity of each water-soluble compound in nonwatercored 'Fuji' was set as 1

ns: not significant; \*, \*\* and \*\*\*; significant at  $p < 0.05$ , 0.01, and 0.001, respectively.

WC: watercored; nonWC: nonwatercored
