# Supplementary material for: Flavor and Texture Characteristics of ‘Fuji’ and Related Apple (Malus domestica L.) Cultivars, Focusing on the Rich Watercore
Source: MDPI journal article supplement (doi:10.3390/molecules25051114), 2020-03-02
Supplement: s1 [file s1]

## Intensity of volatiles in watercored and nonwatercored 'Fuji' and 'Koutoku' apples

| Volatiles                       | 'Fuji' |                | 'Koutoku'      |                | Significance |     |             |
|---------------------------------|--------|----------------|----------------|----------------|--------------|-----|-------------|
|                                 | WC     | nonWC          | WC             | nonWC          | cultivar     | WC  | interaction |
| <b>Alcohols</b>                 |        |                |                |                |              |     |             |
| Methanol                        | 1      | 1.95           | 0.45           | 0.48           | ***          | **  | *           |
| iso-Propanol                    | 1      | 0.07           | 0.00           | 0.00           | ***          | *** | ***         |
| Ethanol                         | 1      | 2.42           | 1.77           | 2.08           | ns           | *   | ns          |
| Propanol                        | 1      | 0.48           | 1.60           | 0.18           | ns           | *   | ns          |
| 2-Methylpropanol                | 1      | 0.92           | 0.99           | 0.42           | ns           | *   | ns          |
| Butanol                         | 1      | 0.72           | 0.51           | 0.12           | ***          | *** | ns          |
| 2-Methylbutanol                 | 1      | 0.69           | 0.49           | 0.26           | **           | **  | ns          |
| Pentanol                        | 1      | 0.81           | 0.21           | 0.12           | ***          | *   | ns          |
| Hexanol                         | 1      | 0.69           | 0.28           | 0.13           | ***          | *   | ns          |
| Octanol                         | 1      | 1.35           | 0.71           | 0.16           | ns           | ns  | ns          |
| Acetol                          | 1      | 0.50           | 7.37           | 5.06           | ns           | ns  | ns          |
| (E)-2-hexen-1-ol                | 1      | 0.69           | 0.00           | 0.04           | ***          | ns  | ns          |
| 6-Methyl-5-hepten-2-ol          | 1      | 20.33          | 12.10          | 6.19           | ns           | ns  | ns          |
| 2-Ethylhexanol                  | 1      | 0.91           | 0.61           | 0.91           | ns           | ns  | ns          |
| Furfuryl alcohol                | -      | -              | 5 <sup>s</sup> | 5 <sup>s</sup> | *            | ns  | ns          |
| (E)-Linalool oxide              | 1      | 1.30           | -              | -              | **           | ns  | ns          |
| <b>Aldehydes</b>                |        |                |                |                |              |     |             |
| Butanal                         | 1      | 0.42           | 0.48           | 0.05           | ***          | *** | *           |
| 2-Methylbutanal                 | 1      | -              | -              | -              | ***          | *** | ***         |
| Pentanal                        | 1      | 0.58           | -              | -              | ***          | *** | ***         |
| Hexanal                         | 1      | 0.63           | 0.07           | 0.06           | ***          | *** | ***         |
| Heptanal                        | 1      | 0.42           | -              | -              | ***          | **  | **          |
| Octanal                         | 1      | 0.21           | -              | -              | **           | *   | *           |
| Nonanal                         | 1      | 0.52           | 0.00           | 0.27           | ***          | ns  | **          |
| Decanal                         | 1      | 0.27           | 0.56           | 0.81           | ns           | ns  | ns          |
| (E)-2-Hexenal                   | 1      | 0.69           | 0.11           | 0.13           | ***          | ns  | *           |
| (E)-2-Heptenal                  | 1      | 0.75           | 0.01           | 0.04           | ***          | *   | **          |
| (E)-2-Octenal                   | 1      | 0.56           | 0.01           | 0.03           | ***          | **  | **          |
| 2,4-Heptadienal                 | 1      | 1.45           | -              | -              | ***          | **  | **          |
| Benzaldehyde                    | 1      | 2.54           | 0.44           | 0.20           | **           | ns  | ns          |
| <b>Ketones</b>                  |        |                |                |                |              |     |             |
| acetone                         | 1      | 0.65           | 0.42           | 0.30           | ***          | **  | ns          |
| 1-Octen-3-one                   | 1      | 0.35           | -              | -              | ***          | *   | *           |
| 6-methyl-5-hepten-2-one         | 1      | 0.65           | 0.15           | 0.15           | ***          | ns  | ns          |
| <b>Acids</b>                    |        |                |                |                |              |     |             |
| Acetic acid                     | 1      | 9.02           | 3.41           | 4.93           | ns           | ns  | ns          |
| 2-Methylbutanoic acid           | -      | -              | 5 <sup>s</sup> | 4 <sup>s</sup> | ns           | ns  | ns          |
| <b>Esters</b>                   |        |                |                |                |              |     |             |
| Methyl acetate                  | 1      | 75.38          | 0.32           | 3.52           | ***          | *** | ***         |
| Methyl propanoate               | 1      | 17.55          | -              | -              | ***          | *** | ***         |
| Methyl butanoate                | -      | 6 <sup>s</sup> | -              | -              | **           | **  | **          |
| Methyl 2-methylbutanoate        | -      | 6 <sup>s</sup> | 4 <sup>s</sup> | 5 <sup>s</sup> | ***          | *** | ***         |
| Methyl hexanoate                | 1      | 6.26           | 2.67           | 0.40           | ns           | ns  | ns          |
| Ethyl acetate                   | 1      | 156.07         | 2.07           | 28.74          | ***          | *** | ***         |
| Ethyl propanoate                | 1      | 165.34         | 7.96           | 125.16         | ns           | *** | ***         |
| Ethyl iso-butanoate             | 1      | 503.41         | 0.00           | 0.00           | **           | **  | **          |
| Ethyl butanoate                 | 1      | 30.44          | 1.34           | 10.70          | **           | *** | **          |
| Ethyl 2-methylbutanoate         | 1      | 87.05          | 1.22           | 30.29          | *            | **  | *           |
| Ethyl pentanoate                | 1      | 0.61           | -              | 1.74           | ns           | ns  | ns          |
| Ethyl hexanoate                 | -      | 7 <sup>s</sup> | -              | 6 <sup>s</sup> | ***          | *** | ***         |
| Ethyl tiglate                   | -      | 5 <sup>s</sup> | -              | -              | ***          | *** | ***         |
| Ethyl octanoate                 | -      | -              | 3 <sup>s</sup> | 4 <sup>s</sup> | ns           | ns  | ns          |
| Ethyl 3-hydroxyhexanoate        | 1      | 94.31          | 18.28          | 220.94         | ns           | *   | ns          |
| Propyl acetate                  | 1      | 0.56           | 2.09           | 0.36           | ns           | **  | *           |
| Propyl propanoate               | 1      | 0.53           | 1.31           | 0.31           | ns           | ns  | ns          |
| Propyl 2-methylbutanoate        | 1      | 0.26           | 0.23           | 0.07           | ns           | ns  | ns          |
| Propyl hexanoate                | 1      | 0.31           | 1.04           | 0.12           | ns           | *   | ns          |
| Butyl acetate                   | 1      | 0.48           | 0.16           | 0.02           | ***          | **  | ns          |
| Butyl propanoate                | 1      | 0.17           | -              | -              | ***          | **  | **          |
| Butyl butanoate                 | 1      | 0.21           | -              | -              | ***          | *** | ***         |
| Butyl 2-methylbutanoate         | 1      | 0.24           | 0.05           | 0.00           | **           | **  | *           |
| Butyl hexanoate                 | 1      | 0.39           | 0.74           | 0.05           | ns           | *   | ns          |
| Butyl octanoate                 | 1      | 0.33           | -              | -              | **           | ns  | ns          |
| iso-Butyl acetate               | 1      | 0.35           | 0.15           | 0.00           | **           | *   | ns          |
| iso-Butyl butanoate             | 1      | 0.13           | 0.13           | 0.02           | ***          | *** | **          |
| 2-Methylbutyl acetate           | 1      | 0.54           | 0.14           | 0.03           | **           | *   | ns          |
| 2-Methylbutyl butanoate         | 1      | 4.38           | -              | -              | ns           | ns  | ns          |
| 2-Methylbutyl 2-methylbutanoate | 1      | 0.46           | -              | -              | *            | ns  | ns          |
| 2-Methylbutyl hexanoate         | 1      | 1.05           | 1.71           | 0.10           | ns           | ns  | ns          |
| Pentyl acetate                  | 1      | 0.31           | 0.07           | 0.01           | ***          | *** | ***         |
| Pentyl butanoate                | 1      | 0.15           | 0.73           | 0.09           | ns           | **  | ns          |
| Hexyl acetate                   | 1      | 0.26           | 0.18           | 0.01           | ***          | **  | ***         |

|                            |   |      |                |                |     |     |     |
|----------------------------|---|------|----------------|----------------|-----|-----|-----|
| Hexyl propanoate           | - | -    | 5 <sup>§</sup> | 5 <sup>§</sup> | *** | **  | **  |
| Hexyl butyrate             | 1 | 0.12 | 0.00           | 0.00           | *** | *** | *** |
| Hexyl 2-methylbutanoate    | 1 | 0.19 | 0.44           | 0.05           | **  | *** | *   |
| Hexyl hexanoate            | - | -    | 5 <sup>§</sup> | 5 <sup>§</sup> | ns  | ns  | ns  |
| (E)-2-Hexenyl acetate      | 1 | 0.20 | -              | -              | **  | *   | *   |
| <b>Others</b>              |   |      |                |                |     |     |     |
| Toluene                    | 1 | 0.63 | -              | -              | **  | ns  | ns  |
| (E,E)- $\alpha$ -farnesene | 1 | 0.21 | -              | -              | ns  | ns  | ns  |
| unknown                    | 1 | 0.26 | -              | -              | *** | *** | *** |

Intensity of each volatile in non-watercored 'Fuji' was set as 1,

§; peak area in the logarithm intensity of volatile that was not detected in nonwatercore 'Fuji'

ns: not significant; \*, \*\* and \*\*\*; significant at  $p < 0.05$ , 0.01, and 0.001, respectively.

WC: watercored; nonWC: nonwatercored
